# Supplementary material for: The Medical Triazole Voriconazole Can Select for Tandem Repeat Variations in Azole-Resistant Aspergillus Fumigatus Harboring TR34/L98H Via Asexual Reproduction
Source: PubMed Central journal article supplement (PMC7711461; doi:10.3390/jof6040277), 2020-11-11
Supplement: jof-06-00277-s001.pdf [file jof-06-00277-s001.pdf]

## Supplemental documents

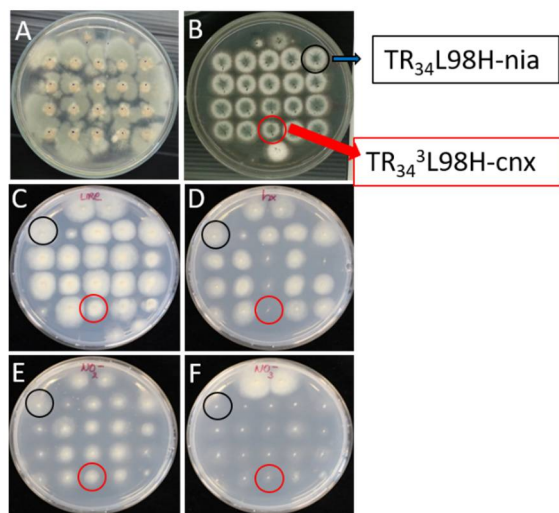

**Figure S1.** Isolation and classification of nitrate non-utilising mutants based on resistance to chlorate. For TR<sub>34</sub>/L98H strain a *nia* (chlorate resistant, nitrate non-utilising, hypoxanthine and nitrite utilising) and for TR<sub>34</sub><sup>3</sup>/L98H a *cnx* (chlorate resistant, nitrate and hypoxanthine non-utilising, nitrite utilising) mutant was selected. A: Chlorate resistant mutants appear as sectors after UV radiation 60s (20 erg/mm<sup>2</sup>/sec). B: Master plate of putative chlorate resistant mutants (from top side) C-F: Growth test of colonies from the masterplate transferred to plates with respectively as single N-source: Urea, Hypoxanthine, Nitrite and Nitrate (photograph from back side).

**Table S1.** The characteristics of chlorate resistant *nia* and *cnx* mutants for their ability to utilise urea, hypoxanthine, nitrite and nitrate as sole N-source.

|                                                | N-source |         |         |              |
|------------------------------------------------|----------|---------|---------|--------------|
|                                                | Ure      | Nitrite | Nitrate | Hypoxanthine |
| TR <sub>34</sub> L98H- <i>nia</i>              | +*       | +       | -*      | +            |
| TR <sub>34</sub> <sup>3</sup> L98H- <i>cnx</i> | +        | +       | -       | -            |

+: growth, -no growth

**Table S2.** The SNPs calling between the ancestor TR<sub>34</sub>/L98H (V30-40) and evolved isolate TR<sub>34</sub><sup>3</sup>/L98H. From left to right columns indicate **chromosome number** and **position** on reference genome (clinical strain AF293), **variant type** (ref allele / alternative allele), **genotype** calling (0=similar to reference, 1=alternative, in brackets: read depth of reference allele / read depth of alternative allele) for ancestor and **genotype** calling of evolved isolate (0=similar to reference, 1=alternative, in brackets: read depth of reference allele / read depth of alternative allele), **effect of variant** and amino acid substitution, **gene** and **function** of gene

| Chromosome number | Position        | Variant type (change in nucleotide) | Genotype Clinical ancestor TR <sub>34</sub> /L98H (V30-40) | Genotype Evolved isolate TR <sub>34</sub> <sup>3</sup> /L98H | Effect of variant             | Gene / Function                                                                                              |
|-------------------|-----------------|-------------------------------------|------------------------------------------------------------|--------------------------------------------------------------|-------------------------------|--------------------------------------------------------------------------------------------------------------|
| 1                 | 1971284-1971287 | deletion<br>TTCT / -                | 0 (31/0)                                                   | <b>1 (4/23)</b>                                              | Glu314<br>Frameshift          | AFUA_1G06920<br>Serine / threonine protein kinase/<br>may involve in growth                                  |
| 2                 | 692713          | Snp<br>A / G                        | 0 (51/0)                                                   | <b>1 (0/56)</b>                                              | Non-synonymous<br>Leu 147 Pro | AFUA_2G02690<br>AtrR<br>transcription factor/ plays an essential role in regulating <i>cyp51A</i> expression |
| 4                 | 1560507         | Snp<br>C / T                        | 0 (43/ 0)                                                  | <b>1 (0/38)</b>                                              | Non-synonymous<br>Leu 636 Phe | AFUA_5G06450<br>Vacuolar protein sorting protein DigA/ may involve in vacuole organization                   |

**Table S3.** In vitro azole susceptibility profiles of TR<sub>34</sub>/L98H, Transient TR<sub>34</sub>/L98H and TR<sub>34</sub><sup>3</sup>/L98H

| Isolate code | Type                                    | MIC |     |     |
|--------------|-----------------------------------------|-----|-----|-----|
|              |                                         | ITR | VOR | POS |
| V30-40       | Ancestor TR <sub>34</sub> /L98H(V30-40) | >16 | 4   | 0,5 |
| V284-36      | Transient TR <sub>34</sub> /L98H        | >16 | >16 | >8  |
| V284-37      | TR <sub>34</sub> <sup>3</sup> /L98H     | >16 | >16 | >8  |

A difference in resistance to VOR and POS between Transient TR<sub>34</sub>/L98H and its successor TR<sub>34</sub><sup>3</sup>/L98H cannot be detected in a MIC assay because both still grew at the highest concentrations of VOR and POS that can be applied.

Expression of *cyp51A* in the TR<sub>34</sub><sup>3</sup>/L98H isolate, was compared with that of the TR<sub>34</sub>/L98H ancestor, Transient TR<sub>34</sub>/L98H and a WT control isolate. Transient TR<sub>34</sub>/L98H harboured two SNPs: the AtrR mutation and another in protein PtaB (Table S4). The level of *cyp51A*-expression of the Transient TR<sub>34</sub>/L98H isolate was higher than that of the ancestor, but lower than that of TR<sub>34</sub><sup>3</sup>/L98H (Figure S1). These data suggest that the AtrR gene mutation alone could not cause the same expression level of *cyp51A* as TR<sub>34</sub><sup>3</sup>/L98H. Therefore, in the TR<sub>34</sub><sup>3</sup>/L98H, the 12-fold overexpression of *cyp51A* is likely the combined effect of the AtrR mutation and three copies of 34bp.

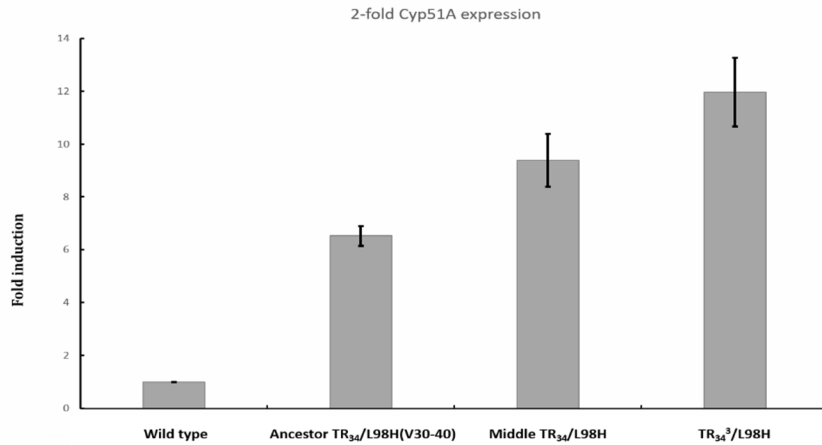

**Figure S2.** Expression of *cyp51A* in the TR<sub>34</sub><sup>3</sup>/L98H isolate, compared with ancestry isolates TR<sub>34</sub>/L98H and Transient TR<sub>34</sub>/L98H, and a WT control isolate.

**Table S4:** The gene mutations in TR<sub>34</sub><sup>3</sup>/L98H and Transient TR<sub>34</sub>/L98H isolate compared with the TR<sub>34</sub>/L98H (V30-40) ancestor.

|                                             | Mutations on gene / function compared to ancestor TR <sub>34</sub> /L98H                                                          |                                                                                                                                                 |                                                                                                         |                                                                                                                                                                                                          |
|---------------------------------------------|-----------------------------------------------------------------------------------------------------------------------------------|-------------------------------------------------------------------------------------------------------------------------------------------------|---------------------------------------------------------------------------------------------------------|----------------------------------------------------------------------------------------------------------------------------------------------------------------------------------------------------------|
| Transient TR <sub>34</sub> /L98H            |                                                                                                                                   | Non-synonymous AFUA_2G02690/ Leu 24 Pro<br><br><b>AtrR</b> transcription factor/ plays an essential role in regulating <i>cyp51A</i> expression |                                                                                                         | Non-synonymous AFUA_1G06920<br><b>PtaB</b> protein Ser 390 Phe, a lim-domain binding protein in <i>Aspergillus fumigatus</i> which regulates biofilm formation and conidiation through distinct pathways |
| Evolved TR <sub>34</sub> <sup>3</sup> /L98H | Non-synonymous AFUA_5G06450/ Leu 636 Phe<br><br><b>Vacuolar protein</b> sorting protein DigA/ may involve in vacuole organization | Non-synonymous AFUA_2G02690/ Leu 24 Pro<br><br><b>AtrR</b> transcription factor/ plays an essential role in regulating <i>cyp51A</i> expression | Glu 314 Frameshift, AFUA_1G06920<br><br><b>Serine / threonine protein kinase/</b> may involve in growth |                                                                                                                                                                                                          |
